# Supplementary material
Source: PubMed Central journal article supplement (PMC8190438)
Supplement: mmc1.pdf [file mmc1.pdf]

## S1 Appendix

Overview: Page no.

1. Figure 1: Time from recovery to inclusion correlates with antibody volume and cumulative CD8+ T-cell response
2. Figure 2: Full gating strategy for CD8+ T cell dextramer staining.
3. Figure 3: Distribution of non-CD8+ T-cell responders IC50 values within the cohort:

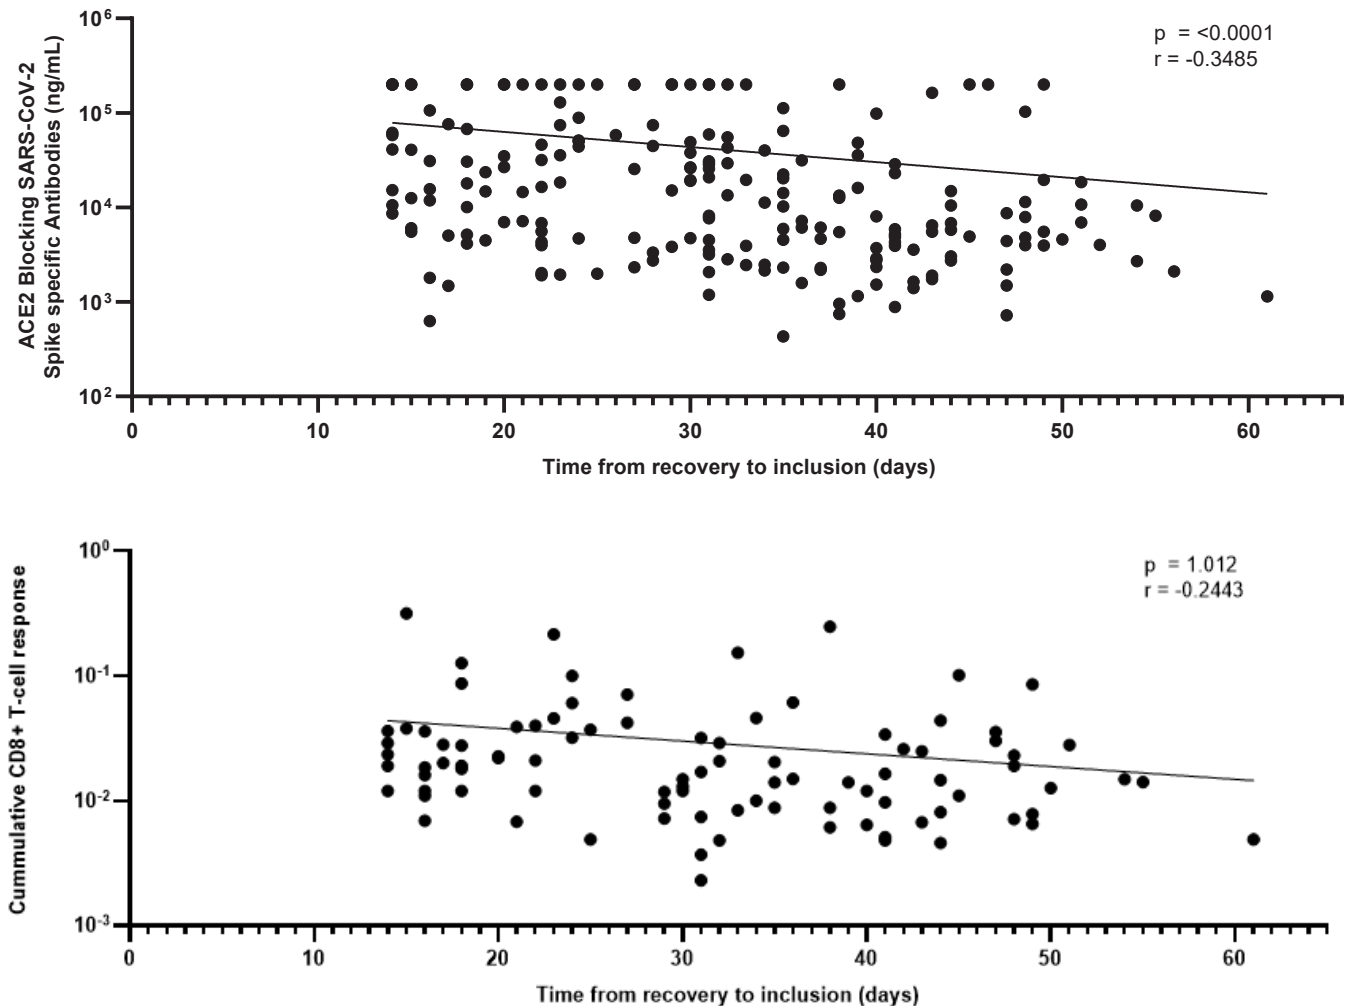

**Appendix Figure 1: Time from recovery to inclusion correlates with antibody volume and cumulative CD8+ T-cell response.** **A:** The time from recovery to inclusion in days (x) plotted against ACE2 Blocking SARS-CoV-2 Spike specific antibodies in ng/mL (y). Correlation by Spearman's rank coefficient,  $p < 0.0001$ .  $n = 203$  **B:** Time from recovery to inclusion correlates the cumulative CD8+ T-cell response. The time from recovery to inclusion in days (x) plotted against cumulative CD8+ T-cell response in % (y). Correlation by Spearman's rank coefficient,  $p = 0.012$ .  $n = 106$

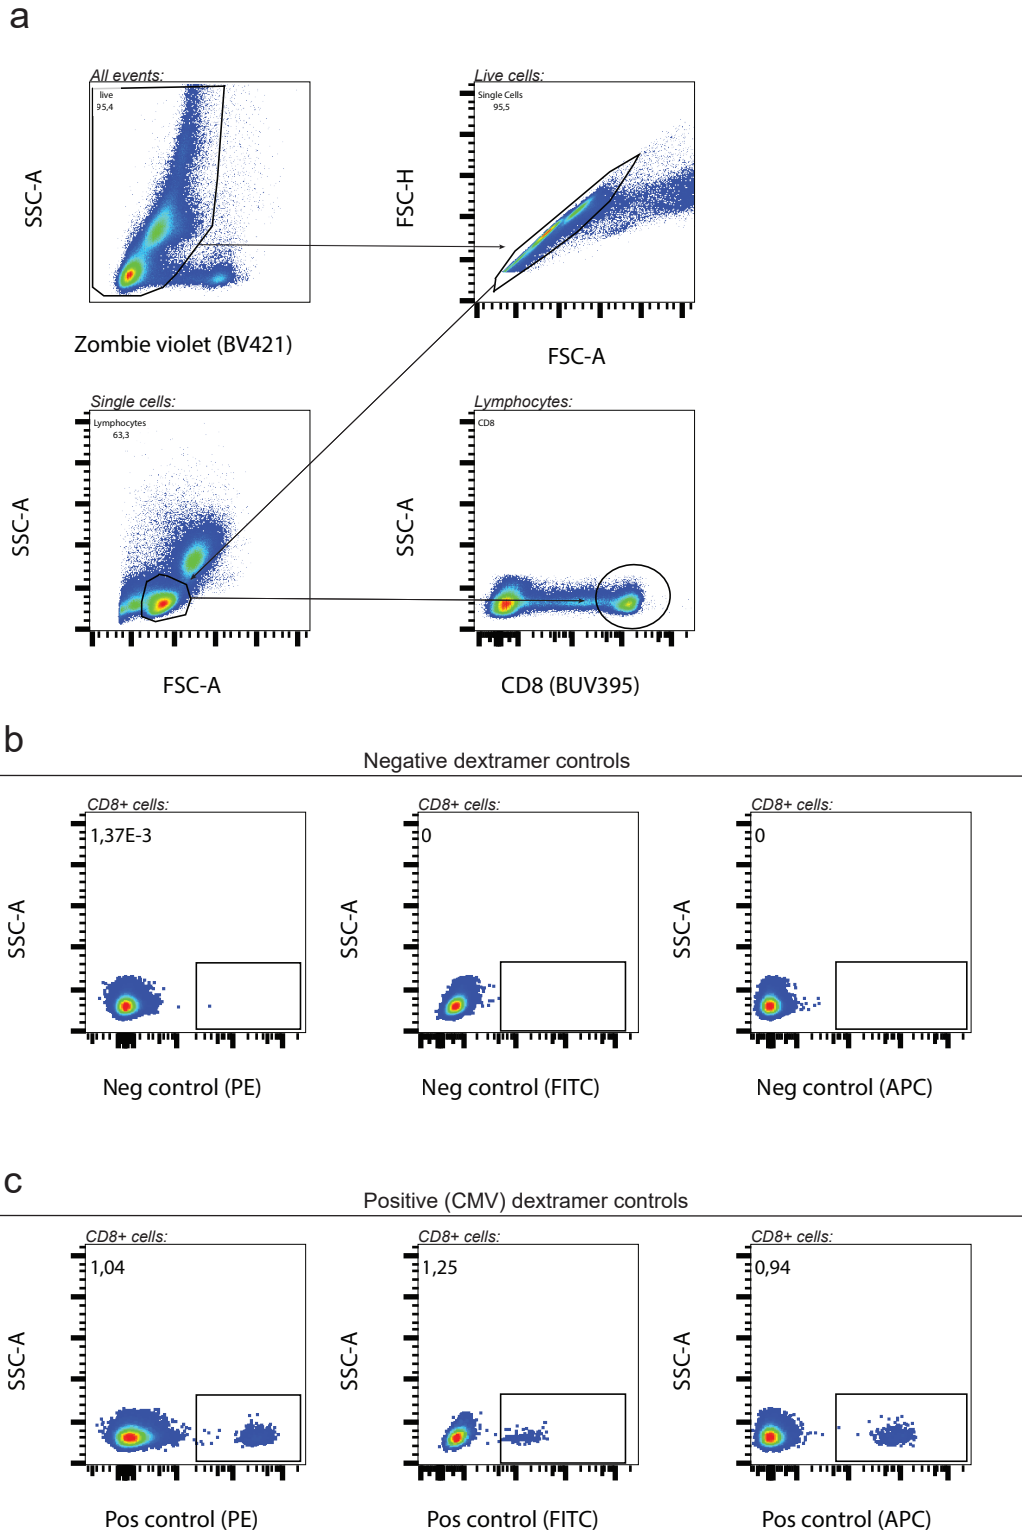

**Appendix Figure 2: Full gating strategy for CD8+ T cell dextramer staining. A)** Gating strategy for the isolation of first live cell events, single cells, lymphocytes and finally CD8+ T cells. **B)** Negative control dextramer gates for PE, FITC and APC fluorophores. **C)** Positive control dextramer gates for PE, FITC and APC fluorophores.

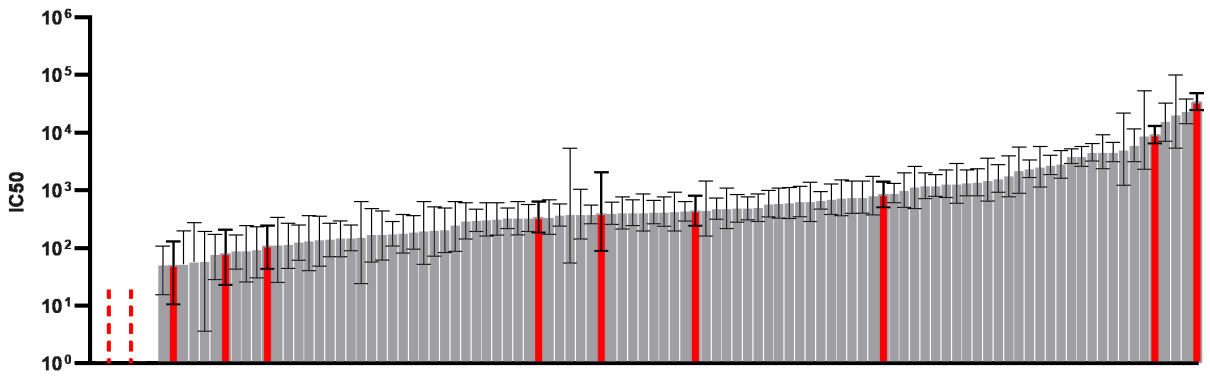

**Appendix Figure 3: Distribution of non-CD8+ T-cell responders IC50 values within the cohort:** Listed IC50 values for all HLA-A2+ individuals, ranked from lowest to highest. Individuals without a detectable CD8+ T-cell response to any of the applied dextramer epitopes are shown in red. Six HLA-A2+ individuals were unable to neutralize pseudovirus 100 %, and have no IC50 values assigned. Two of them showed no detectable CD8+ T-cell response, and are schematically illustrated by red dotted lines.
